# Supplementary material
Source: Springer Nature journal article supplement (https://www.springermedizin.de/resource/supplementary/12936_2010_1382_MOESM3_ESM.pdf/9549668)

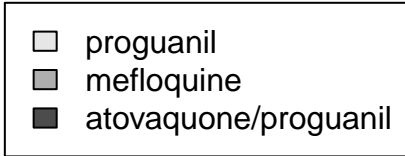

Number of prescriptions

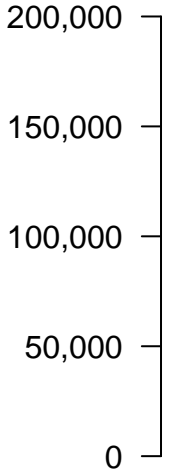

2000 2001 2002 2003 2004 2005 2006 2007

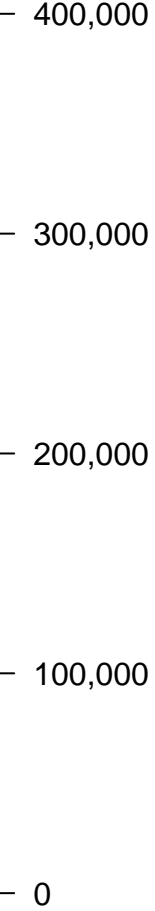

Number of travelers

Supplement: MOESM3 [file 9549668]
